# Supplementary material for: Bone Mineral Density and Trabecular Bone Score Changes throughout Menopause in Women with HIV
Source: MDPI journal article supplement (doi:10.3390/v15122375), 2023-12-01
Supplement: s1 [file s1]

**Supplementary Table S1** depicts STRAW periods according to endocrine and menstrual cycle criteria. The main criteria for menopause were the absence of menstrual bleeding for more than 1 year or history of total abdominal hysterectomy. Supportive criteria used in this study included biomarkers of ovary insufficiency.

**Final menstrual period**

| Stage              |                            |                                                            | +1a                                                                      | +1b                          | +1c | +2 |
|--------------------|----------------------------|------------------------------------------------------------|--------------------------------------------------------------------------|------------------------------|-----|----|
| TERMS              | <i>Reproductive period</i> | <i>Menopause transition period</i>                         | <i>Early menopause period</i>                                            | <i>Late menopause period</i> |     |    |
| MENSTRUAL CYCLE    | Regular                    | Variable length with intervals of amenorrhea of >= 60 days | Amenorrhea                                                               | Amenorrhea                   |     |    |
| ENDOCRINE CRITERIA |                            |                                                            | Biomarkers of ovary insufficiency: LH>25ng/mL; FSH>25 ng/mL; E2<30 ng/mL |                              |     |    |

**Supplementary Table S2.** Trends of BMD across menopause periods according to different risk factors.

**Supplementary Table S2A.** Estimations of BMD trends in WWH according to use of bisphosphonates.

|                                                                                        | Estimate | p      |
|----------------------------------------------------------------------------------------|----------|--------|
| No: (Early menopause - Menopause transition) vs (Menopause transition - Reproductive)  | -0.046   | 0.003  |
| No: (Late menopause - Early menopause) vs (Menopause transition - Reproductive)        | -0.054   | <0.001 |
| No: (Late menopause - Early menopause) vs (Early menopause - Menopause transition)     | -0.008   | 0.511  |
| Yes: (Early menopause - Menopause transition) vs (Menopause transition - Reproductive) | -0.074   | 0.077  |
| Yes: (Late menopause - Early menopause) vs (Menopause transition - Reproductive)       | -0.054   | 0.041  |
| Yes: (Late menopause - Early menopause) vs (Menopause transition - Reproductive)       | 0.020    | 0.433  |
| (Menopause transition - Reproductive): No vs Yes                                       | -0.068   | 0.003  |
| (Early menopause - Menopause transition): No vs Yes                                    | -0.039   | 0.059  |
| (Late menopause - Early menopause): No vs Yes                                          | -0.068   | <0.001 |
| Reproductive: No vs Yes                                                                | 0.138    | <0.001 |
| Menopause transition: No vs Yes                                                        | 0.070    | 0.001  |
| Early menopause: No vs Yes                                                             | 0.030    | 0.001  |
| Late menopause: No vs Yes                                                              | -0.038   | 0.013  |

**Supplementary Table S2B.** Estimations of BMD trends in WWH according to kidney function [eGFR < 60 (yes) vs  $\geq 60$  ml/min/1.73m<sup>2</sup> (no)].

|                                                                                        | Estimate | p      |
|----------------------------------------------------------------------------------------|----------|--------|
| No: (Early menopause - Menopause transition) vs (Menopause transition - Reproductive)  | -0.060   | 0.004  |
| No: (Late menopause - Early menopause) vs (Menopause transition - Reproductive)        | -0.064   | <0.001 |
| No: (Late menopause - Early menopause) vs (Early menopause - Menopause transition)     | -0.004   | 0.783  |
| Yes: (Early menopause - Menopause transition) vs (Menopause transition - Reproductive) | -0.060   | 0.087  |
| Yes: (Late menopause - Early menopause) vs (Menopause transition - Reproductive)       | -0.044   | 0.051  |
| Yes: (Late menopause - Early menopause) vs (Menopause transition - Reproductive)       | 0.016    | 0.513  |
| (Menopause transition - Reproductive): No vs Yes                                       | -0.014   | 0.368  |
| (Early menopause - Menopause transition): No vs Yes                                    | -0.015   | 0.381  |
| (Late menopause - Early menopause): No vs Yes                                          | -0.034   | 0.016  |
| Reproductive: No vs Yes                                                                | 0.016    | 0.253  |
| Menopause transition: No vs Yes                                                        | 0.001    | 0.930  |
| Early menopause: No vs Yes                                                             | -0.013   | 0.157  |
| Late menopause: No vs Yes                                                              | -0.047   | 0.002  |

**Supplementary Table S2C.** Estimations of BMD trends in WWH according to BMI [BMI  $\geq 25$  (yes) vs. <25 kg/m<sup>2</sup> (no)].

|                                                                                        | Estimate | p      |
|----------------------------------------------------------------------------------------|----------|--------|
| No: (Early menopause - Menopause transition) vs (Menopause transition - Reproductive)  | -0.063   | 0.010  |
| No: (Late menopause - Early menopause) vs (Menopause transition - Reproductive)        | -0.073   | <0.001 |
| No: (Late menopause - Early menopause) vs (Early menopause - Menopause transition)     | -0.009   | 0.580  |
| Yes: (Early menopause - Menopause transition) vs (Menopause transition - Reproductive) | -0.057   | 0.041  |
| Yes: (Late menopause - Early menopause) vs (Menopause transition - Reproductive)       | -0.036   | 0.058  |
| Yes: (Late menopause - Early menopause) vs (Menopause transition - Reproductive)       | 0.021    | 0.266  |
| (Menopause transition - Reproductive): No vs Yes                                       | -0.001   | 0.914  |
| (Early menopause - Menopause transition): No vs Yes                                    | -0.008   | 0.458  |
| (Late menopause - Early menopause): No vs Yes                                          | -0.038   | 0.005  |
| Reproductive: No vs Yes                                                                | -0.022   | 0.024  |
| Menopause transition: No vs Yes                                                        | -0.023   | 0.037  |
| Early menopause: No vs Yes                                                             | -0.030   | <0.001 |
| Late menopause: No vs Yes                                                              | -0.069   | <0.001 |

**Supplementary Table S2D.** Estimations of BMD trends in WWH according to use of TDF.

|                                                                                        | Estimate | p      |
|----------------------------------------------------------------------------------------|----------|--------|
| No: (Early menopause - Menopause transition) vs (Menopause transition - Reproductive)  | -0.060   | 0.014  |
| No: (Late menopause - Early menopause) vs (Menopause transition - Reproductive)        | -0.054   | 0.001  |
| No: (Late menopause - Early menopause) vs (Early menopause - Menopause transition)     | 0.006    | 0.707  |
| Yes: (Early menopause - Menopause transition) vs (Menopause transition - Reproductive) | -0.060   | 0.014  |
| Yes: (Late menopause - Early menopause) vs (Menopause transition - Reproductive)       | -0.054   | 0.001  |
| Yes: (Late menopause - Early menopause) vs (Menopause transition - Reproductive)       | 0.006    | 0.707  |
| Menopause transition: No vs Yes                                                        | 0.025    | <0.001 |
| Early menopause: No vs Yes                                                             | 0.025    | <0.001 |
| Late menopause: No vs Yes                                                              | 0.025    | <0.001 |

**Supplementary Table S2E.** Estimations of BMD trends in WWH according to use of PI.

|                                                                                        | Estimate | p      |
|----------------------------------------------------------------------------------------|----------|--------|
| No: (Early menopause - Menopause transition) vs (Menopause transition - Reproductive)  | -0.087   | 0.001  |
| No: (Late menopause - Early menopause) vs (Menopause transition - Reproductive)        | -0.072   | <0.001 |
| No: (Late menopause - Early menopause) vs (Early menopause - Menopause transition)     | 0.015    | 0.435  |
| Yes: (Early menopause - Menopause transition) vs (Menopause transition - Reproductive) | -0.033   | 0.187  |
| Yes: (Late menopause - Early menopause) vs (Menopause transition - Reproductive)       | -0.036   | 0.026  |
| Yes: (Late menopause - Early menopause) vs (Menopause transition - Reproductive)       | -0.003   | 0.863  |
| (Menopause transition - Reproductive): No vs Yes                                       | 0.034    | 0.001  |
| (Early menopause - Menopause transition): No vs Yes                                    | -0.020   | 0.035  |
| (Late menopause - Early menopause): No vs Yes                                          | -0.002   | 0.856  |
| Reproductive: No vs Yes                                                                | 0.011    | 0.227  |
| Menopause transition: No vs Yes                                                        | 0.045    | <0.001 |
| Early menopause: No vs Yes                                                             | 0.025    | 0.001  |
| Late menopause: No vs Yes                                                              | 0.023    | 0.109  |

**Supplementary Table S2F.** Estimations of BMD trends in WWH according to current CD4 cell count [current CD4 cell count  $\geq$  500 (yes) vs. <500 c/microL (no)].

|                                                                                        | Estimate | p     |
|----------------------------------------------------------------------------------------|----------|-------|
| No: (Early menopause - Menopause transition) vs (Menopause transition - Reproductive)  | -0.060   | 0.014 |
| No: (Late menopause - Early menopause) vs (Menopause transition - Reproductive)        | -0.054   | 0.001 |
| No: (Late menopause - Early menopause) vs (Early menopause - Menopause transition)     | 0.006    | 0.707 |
| Yes: (Early menopause - Menopause transition) vs (Menopause transition - Reproductive) | -0.060   | 0.014 |
| Yes: (Late menopause - Early menopause) vs (Menopause transition - Reproductive)       | -0.054   | 0.001 |
| Yes: (Late menopause - Early menopause) vs (Menopause transition - Reproductive)       | 0.006    | 0.707 |
| Reproductive: No vs Yes                                                                | 0.017    | 0.043 |
| Menopause transition: No vs Yes                                                        | 0.017    | 0.043 |
| Early menopause: No vs Yes                                                             | 0.017    | 0.043 |
| Late menopause: No vs Yes                                                              | 0.017    | 0.043 |

**Supplementary Table S3.** Trends of TBS across menopause periods according to different risk factors.

**Supplementary Table S3A.** Estimations of TBS trends in WWH according to use of bisphosphonates.

|                                                                                  | Estimate | p     |
|----------------------------------------------------------------------------------|----------|-------|
| No: (Menopause - Menopause transition) vs (Menopause transition - Reproductive)  | -0.052   | 0.012 |
| Yes: (Menopause - Menopause transition) vs (Menopause transition - Reproductive) | -0.052   | 0.012 |
| Reproductive: No vs Yes                                                          | 0.073    | 0.002 |
| Menopause transition: No vs Yes                                                  | 0.073    | 0.002 |
| Menopause: No vs Yes                                                             | 0.073    | 0.002 |

**Supplementary Table S3B.** Estimations of TBS trends in WWH according to smoking status.

|                                                                                  | Estimate | p     |
|----------------------------------------------------------------------------------|----------|-------|
| No: (Menopause - Menopause transition) vs (Menopause transition - Reproductive)  | -0.052   | 0.012 |
| Yes: (Menopause - Menopause transition) vs (Menopause transition - Reproductive) | -0.052   | 0.012 |
| Reproductive: No vs Yes                                                          | 0.034    | 0.041 |
| Menopause transition: No vs Yes                                                  | 0.034    | 0.041 |
| Menopause: No vs Yes                                                             | 0.034    | 0.041 |

**Supplementary Table S3C.** Estimations of TBS trends in WWH according to BMI [BMI  $\geq$  25 (yes) vs. <25 kg/m<sup>2</sup> (no)].

|                                                                                  | Estimate | p      |
|----------------------------------------------------------------------------------|----------|--------|
| No: (Menopause - Menopause transition) vs (Menopause transition - Reproductive)  | -0.083   | <0.001 |
| Yes: (Menopause - Menopause transition) vs (Menopause transition - Reproductive) | -0.021   | 0.546  |
| (Menopause transition - Reproductive): No vs Yes                                 | 0.014    | 0.604  |
| (Menopause - Menopause transition): No vs Yes                                    | -0.049   | 0.015  |
| Reproductive: No vs Yes                                                          | 0.022    | 0.380  |
| Menopause transition: No vs Yes                                                  | 0.035    | 0.130  |
| Menopause: No vs Yes                                                             | -0.014   | 0.462  |

**Supplementary Table S3D.** Estimations of TBS trends in WWH according to use of PI.

|                                                                                  | Estimate | p     |
|----------------------------------------------------------------------------------|----------|-------|
| No: (Menopause - Menopause transition) vs (Menopause transition - Reproductive)  | -0.099   | 0.001 |
| Yes: (Menopause - Menopause transition) vs (Menopause transition - Reproductive) | -0.006   | 0.813 |
| (Menopause transition - Reproductive): No vs Yes                                 | 0.035    | 0.150 |
| (Menopause - Menopause transition): No vs Yes                                    | -0.058   | 0.002 |
| Reproductive: No vs Yes                                                          | 0.007    | 0.753 |
| Menopause transition: No vs Yes                                                  | 0.041    | 0.037 |
| Menopause: No vs Yes                                                             | -0.017   | 0.316 |

**Supplementary Figure S1.** depicts trajectories of BMD Z-score across menopause. Panel A presents the slope coefficient of BMD Z-score change in the 4 STRAW+10 intervals. Panel B describes the average values of BMD Z-score at each transition period. The comparison derived from STRAW+10 periods: (i) reproductive, (ii) menopause transition, (iii) early menopause, and (iv) late menopause.

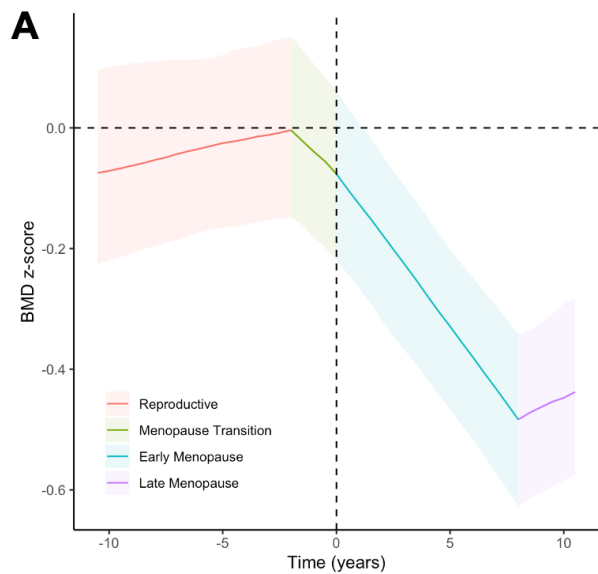

| Predictors | Estimates | p      |         | Coefficients | p      |
|------------|-----------|--------|---------|--------------|--------|
| T1         | 0.01      | 0.202  | T2 - T1 | -0.0454579   | 0.06   |
| T2         | -0.04     | 0.071  | T3 - T1 | -0.0594053   | <0.001 |
| T3         | -0.05     | <0.001 | T4 - T1 | 0.0116170    | 0.42   |
| T4         | 0.02      | 0.128  | T3 - T2 | -0.0139474   | 0.56   |
|            |           |        | T4 - T2 | 0.0570750    | 0.01   |
|            |           |        | T4 - T3 | 0.0710223    | <0.001 |

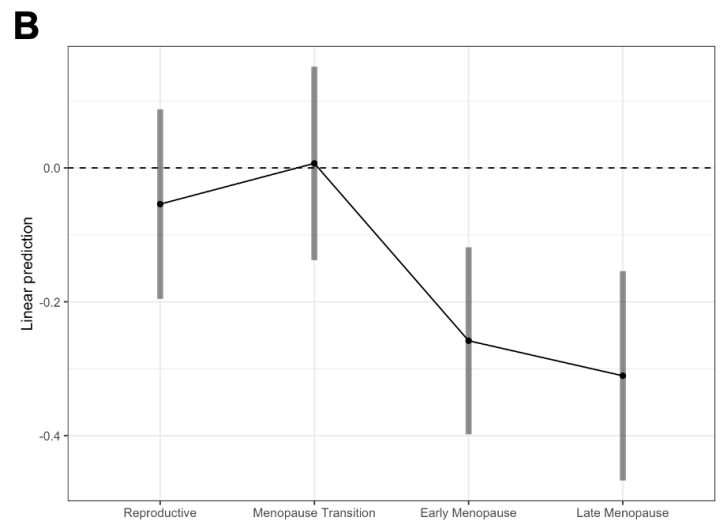

|                                    | Estimates | p      |
|------------------------------------|-----------|--------|
| <b>Reproductive:</b>               |           |        |
| HIV cohort vs reference population | -0.054    | 0.453  |
| <b>Menopause Transition:</b>       |           |        |
| HIV cohort vs reference population | 0.007     | 0.925  |
| <b>Early Menopause:</b>            |           |        |
| HIV cohort vs reference population | -0.258    | <0.001 |
| <b>Late Menopause:</b>             |           |        |
| HIV cohort vs reference population | -0.311    | <0.001 |
